# Supplementary material
Source: publisher site journal article supplement (https://www.spandidos-publications.com/7460/downloadSupplementary)
Supplement: Supplementary file 1 [file downloadSupplementary]

## Sheet: Sheet1
Table SI. Summary of clinical characteristics of three gastric cancer cohorts included in the study.
Clinical characteristics		Cohorts
		TCGA-STAD (375)	GSE84437 (433)	GSE15459 (192)
Age	≤65	164	283	87
	＞65	207	150	105
Gender	Female	134	137	67
	Male	241	296	125
Grade	G1	10	-c	-c
	G2	137	-c	-c
	G3	219	-c	-c
	GX	9	-c	-c
Stage	Ⅰ	53	-c	31
	Ⅱ	111	-c	29
	Ⅲ	150	-c	72
	Ⅳ	38	-c	60
T	T1	19	11	-c
	T2	80	38	-c
	T3	168	92	-c
	T4	100	292	-c
	TX	8	0	-c
N	N0	111	80	-c
	N1	97	188	-c
	N2	75	132	-c
	N3	74	33	-c
	NX	16	0	-c
M	M0	330	-c	-c
	M1	25	-c	-c
	MX	20	-c	-c
Lauren subtype	Diffuse subtype	-c	-c	75
	Intestinal subtype	-c	-c	99
	Mixed subtype	-c	-c	18
OS_statusa	Alive	225	224	97
	Dead	150	209	95
DFS_statusb	Non-recurrence	195	-c	-c
	Recurrence	98	-c	-c
a Status of overall survival.
b Status of disease-free survival.
c Data was not available in the cohorts.
